# Supplementary material for: Enhanced thermoelectric properties exhibited by unreduced freestanding graphene oxide/carbon nanotube membranes
Source: Royal Society of Chemistry journal article supplement (doi:10.1039/d1ma00299f), 2021-01-01
Supplement: d1ma00299f1.pdf [file d1ma00299f1.pdf]

## Supplementary information

### **Enhanced thermoelectric properties exhibited by unreduced freestanding graphene oxide/carbon nanotube membranes**

Md. Saidul Islam,<sup>a,b</sup> Hitomi Ohmagari,<sup>a,c</sup> Mohammad Atiqur Rahman,<sup>a</sup> Yuta Shudo,<sup>a</sup> Masahiro Fukuda,<sup>a</sup> Junyu Yagyu,<sup>a</sup> Yoshihiro Sekine,<sup>a,d</sup> Leonard F. Lindoy,<sup>e</sup> Shinya and Hayami<sup>\*a,b</sup>

<sup>a</sup>Department of Chemistry, Faculty of Advanced Science and Technology, Kumamoto University, 2-39-1 Kurokami, Kumamoto 860-8555, Japan

<sup>b</sup>Institute of Industrial Nanomaterials (IINa), Kumamoto University, 2-39-1 Kurokami, Kumamoto 860-8555, Japan

<sup>c</sup>College of Science and Engineering, Aoyama Gakuin University, 5-10-1 Fuchinobe, Chuo-ku, Sagami-hara, Kanagawa 252-5258, Japan

<sup>d</sup>Priority Organization for Innovation and Excellence, Kumamoto University, 2-39-1 Kurokami, Chuo-ku, Kumamoto 860-8555, Japan.

<sup>e</sup>School of Chemistry F11, The University of Sydney Sydney, New South Wales 2006 (Australia)

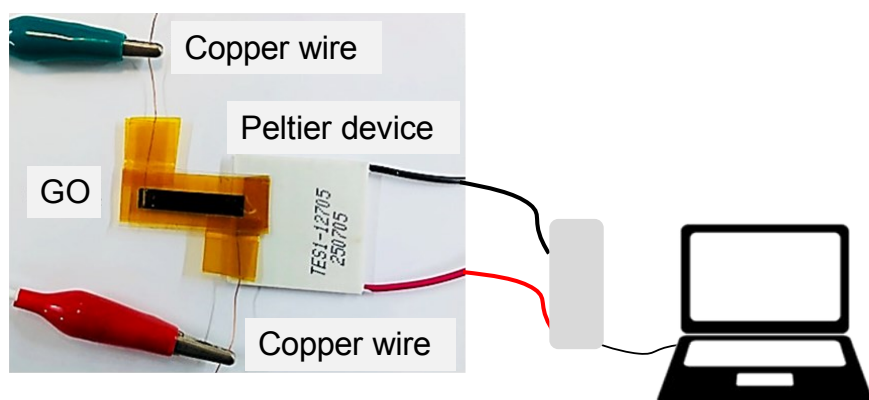

Figure S1: Experimental setup for Seebeck coefficient measurement.

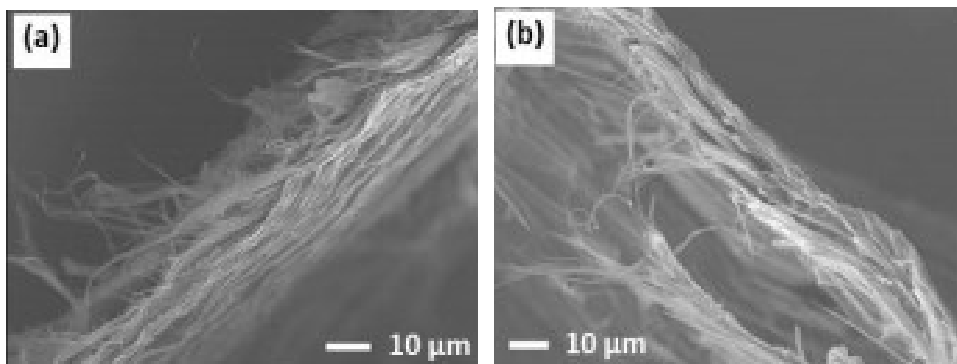

Figure S2: SEM images for a) GO/CNT (1:0.5) and b) GO/CNT (1:1)

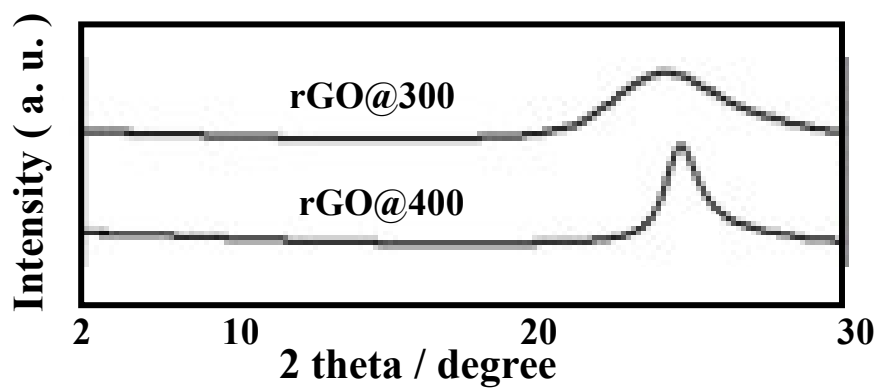

Figure S3: XRD patterns for rGO following its reduction at 300 and 400  $^{\circ}\text{C}$

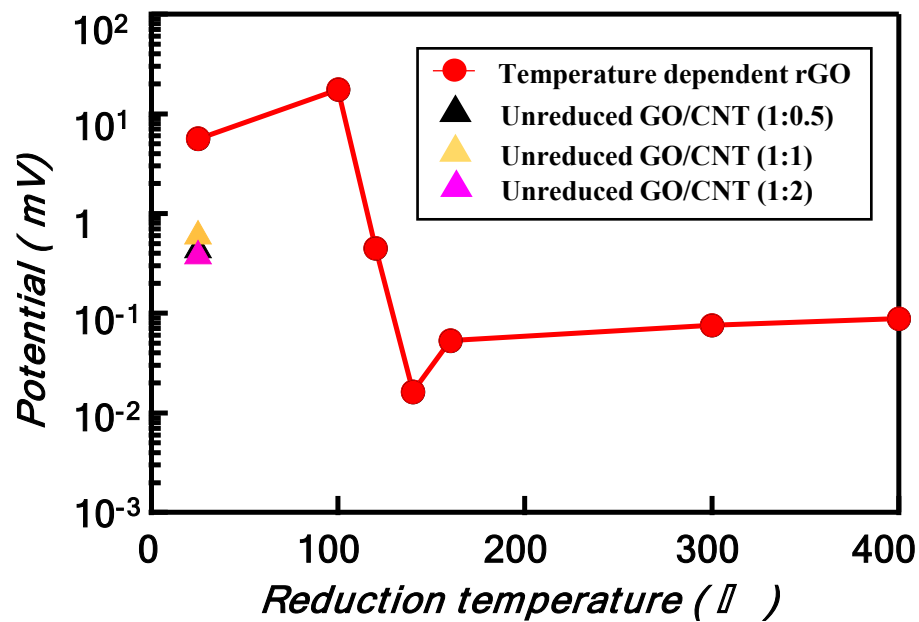

Figure S4: The thermo-voltages measured across the two ends by heating one end of GO, rGO (100-400 °C) and GO/CNT (1:0.5, 1:1, and 1:2) weight ratio.
